# Supplementary material for: Characterization of the gut microbiota in different immunological responses among PLWH
Source: Research Square preprint supplement (doi:10.21203/rs.3.rs-4591403/v1), 2024-07-18
Supplement: Supplementary file 1 [file 4574acaec87d0f12275ddf68.docx]

| Table S2 LEfSe of immune responders and non-immune responders was analyzed | | | | | | | |
| --- | --- | --- | --- | --- | --- | --- | --- |
| phylum | class | oeder | family | genus | group | LDA value | P value |
| Actinobacteria | Actinobacteria | **Actinomycetales** |  |  | INR | 2.299 | 0.020 |
| Actinobacteria | Actinobacteria | Actinomycetales | **Micrococcaceae** |  | INR | 2.240 | 0.005 |
| Actinobacteria | Actinobacteria | Actinomycetales | Actinomycetaceae | **Actinomyces** | INR | 2.153 | 0.044 |
| Firmicutes | Clostridia | Clostridiales | Peptostreptococcaceae | **Intestinibacter** | INR | 2.084 | 0.021 |
| Actinobacteria | Actinobacteria | Actinomycetales | Micrococcaceae | **Rothia** | INR | 2.355 | 0.005 |
| Bacteroidetes | Bacteroidia | Bacteroidales | **Porphyromonadaceae** |  | IR | 3.523 | 0.008 |
| Bacteroidetes | Bacteroidia | Bacteroidales | Porphyromonadaceae | **Butyricimonas** | IR | 2.493 | 0.030 |
| Bacteroidetes | Bacteroidia | Bacteroidales | Porphyromonadaceae | **Parabacteroides** | IR | 3.426 | 0.007 |
| Firmicutes | Negativicutes | Selenomonadales | Veillonellaceae | **Veillonella** | IR | 3.112 | 0.026 |
