# Supplementary material for: Characterization of the gut microbiota in different immunological responses among PLWH
Source: Research Square preprint supplement (doi:10.21203/rs.3.rs-4591403/v1), 2024-07-18
Supplement: Supplementary file 2 [file bfd90d540064c1f06c9792b6.docx]

| Table S1 LEfSe analysis of different levels of gut microbiota in HIV infected patients and healthy controls | | | | | | | |
| --- | --- | --- | --- | --- | --- | --- | --- |
| phylum | class | oeder | family | genus | group | LDA value | P value |
| **Verrucomicrobia** |  |  |  |  | HC | 3.157 | 0.004 |
| Verrucomicrobia | **Verrucomicrobiae** |  |  |  | HC | 3.157 | 0.011 |
| Verrucomicrobia | **Opitutae** |  |  |  | HC | 4.065 | 0.027 |
| Firmicutes | **Clostridia** |  |  |  | HC | 4.816 | 0.007 |
| Verrucomicrobia | Verrucomicrobiae | **Verrucomicrobiales** |  |  | HC | 3.123 | 0.011 |
| Verrucomicrobia | Opitutae | **Puniceicoccales** |  |  | HC | 4.089 | 0.027 |
| Firmicutes | Clostridia | **Clostridiales** |  |  | HC | 4.816 | 0.007 |
| Verrucomicrobia | Verrucomicrobiae | Verrucomicrobiales | **Verrucomicrobiaceae** |  | HC | 3.147 | 0.011 |
| Firmicutes | Clostridia | Clostridiales | **Ruminococcaceae** |  | HC | 4.808 | <0.001 |
| Bacteroidetes | Bacteroidia | Bacteroidales | **Rikenellaceae** |  | HC | 2.734 | 0.019 |
| Verrucomicrobia | Opitutae | Puniceicoccales | **Puniceicoccaceae** |  | HC | 4.114 | 0.027 |
| Fusobacteria | Fusobacteriia | Fusobacteriales | **Leptotrichiaceae** |  | HC | 3.761 | 0.027 |
| Firmicutes | Clostridia | Clostridiales | Ruminococcaceae | **Acetanaerobacterium** | HC | 3.130 | 0.011 |
| Verrucomicrobia | Verrucomicrobiae | Verrucomicrobiales | Verrucomicrobiaceae | **Akkermansia** | HC | 3.113 | 0.011 |
| Bacteroidetes | Bacteroidia | Bacteroidales | Rikenellaceae | **Alistipes** | HC | 2.734 | 0.019 |
| Bacteroidetes | Bacteroidia | Bacteroidales | Porphyromonadaceae | **Butyricimonas** | HC | 2.154 | 0.030 |
| Verrucomicrobia | Opitutae | Puniceicoccales | Puniceicoccaceae | **Cerasicoccus** | HC | 4.258 | 0.027 |
| Firmicutes | Clostridia | Clostridiales | Ruminococcaceae | **Clostridium_III** | HC | 3.242 | 0.001 |
| Firmicutes | Clostridia | Clostridiales | Ruminococcaceae | **Clostridium_IV** | HC | 2.634 | 0.046 |
| Bacteroidetes | Bacteroidia | Bacteroidales | Porphyromonadaceae | **Coprobacter** | HC | 2.515 | 0.012 |
| Firmicutes | Negativicutes | Selenomonadales | Veillonellaceae | **Dialister** | HC | 3.753 | 0.002 |
| Firmicutes | Clostridia | Clostridiales | Ruminococcaceae | **Faecalibacterium** | HC | 4.739 | <0.001 |
| Fusobacteria | Fusobacteriia | Fusobacteriales | Leptotrichiaceae | **Leptotrichia** | HC | 3.877 | 0.027 |
| Bacteroidetes | Bacteroidia | Bacteroidales | Porphyromonadaceae | **Odoribacter** | HC | 2.047 | 0.003 |
| Actinobacteria | Actinobacteria | Coriobacteriales | Coriobacteriaceae | **Olsenella** | HC | 2.373 | 0.035 |
| Firmicutes | Clostridia | Clostridiales | Ruminococcaceae | **Oscillibacter** | HC | 2.786 | 0.002 |
| Actinobacteria | Actinobacteria | Actinomycetales | Propionibacteriaceae | **Propionibacterium** | HC | 3.139 | 0.044 |
| Firmicutes | Clostridia | Clostridiales | Lachnospiraceae | **Roseburia** | HC | 3.888 | 0.033 |
| Firmicutes | Clostridia | Clostridiales | Ruminococcaceae | **Ruminococcus** | HC | 3.623 | <0.001 |
| Firmicutes | Clostridia | Clostridiales | Ruminococcaceae | **Sporobacter** | HC | 2.661 | <0.001 |
| Firmicutes | Clostridia | Clostridiales | Ruminococcaceae | **Subdoligranulum** | HC | 3.179 | <0.001 |
| **Fusobacteria** |  |  |  |  | HIV | 4.241 | <0.001 |
| **Actinobacteria** |  |  |  |  | HIV | 3.515 | 0.023 |
| Firmicutes | **Negativicutes** |  |  |  | HIV | 4.915 | <0.001 |
| Fusobacteria | **Fusobacteriia** |  |  |  | HIV | 4.241 | <0.001 |
| Firmicutes | **Erysipelotrichia** |  |  |  | HIV | 3.164 | 0.008 |
| Actinobacteria | **Actinobacteria** |  |  |  | HIV | 3.515 | 0.023 |
| Firmicutes | Negativicutes | **Selenomonadales** |  |  | HIV | 4.915 | <0.001 |
| Fusobacteria | Fusobacteriia | **Fusobacteriales** |  |  | HIV | 4.241 | <0.001 |
| Firmicutes | Erysipelotrichia | **Erysipelotrichales** |  |  | HIV | 3.164 | 0.008 |
| Actinobacteria | Actinobacteria | **Coriobacteriales** |  |  | HIV | 3.439 | 0.003 |
| Actinobacteria | Actinobacteria | **Actinomycetales** |  |  | HIV | 2.170 | 0.007 |
| Firmicutes | Negativicutes | Selenomonadales | **Veillonellaceae** |  | HIV | 4.836 | 0.032 |
| Fusobacteria | Fusobacteriia | Fusobacteriales | **Fusobacteriaceae** |  | HIV | 4.249 | <0.001 |
| Firmicutes | Erysipelotrichia | Erysipelotrichales | **Erysipelotrichaceae** |  | HIV | 3.164 | 0.008 |
| Actinobacteria | Actinobacteria | Coriobacteriales | **Coriobacteriaceae** |  | HIV | 3.439 | 0.003 |
| Actinobacteria | Actinobacteria | Actinomycetales | **Actinomycetaceae** |  | HIV | 2.105 | 0.005 |
| Firmicutes | Negativicutes | Selenomonadales | **Acidaminococcaceae** |  | HIV | 4.135 | 0.030 |
| Firmicutes | Negativicutes | Selenomonadales | Acidaminococcaceae | **Acidaminococcus** | HIV | 3.753 | 0.004 |
| Actinobacteria | Actinobacteria | Actinomycetales | Actinomycetaceae | **Actinomyces** | HIV | 2.022 | 0.006 |
| Actinobacteria | Actinobacteria | Coriobacteriales | Coriobacteriaceae | **Collinsella** | HIV | 3.412 | 0.010 |
| Fusobacteria | Fusobacteriia | Fusobacteriales | Fusobacteriaceae | **Fusobacterium** | HIV | 4.231 | <0.001 |
| Firmicutes | Negativicutes | Selenomonadales | Veillonellaceae | **Megamonas** | HIV | 4.741 | 0.004 |
| Firmicutes | Negativicutes | Selenomonadales | Veillonellaceae | **Megasphaera** | HIV | 4.205 | 0.021 |
| Actinobacteria | Actinobacteria | Coriobacteriales | Coriobacteriaceae | **Slackia** | HIV | 2.431 | <0.001 |
